# Supplementary material for: S1P promotes migration, differentiation and immune regulatory activity in amniotic-fluid–derived stem cells
Source: PubMed Central journal article supplement — Eur J Pharmacol. 2018 Aug 15;833:173–82. doi: 10.1016/j.ejphar.2018.06.005 (PMC6086338; doi:10.1016/j.ejphar.2018.06.005), 2018-08-15
Supplement: mmc1.pdf [file mmc1.pdf]

## **Supplemental Information**

### **S1P promotes migration, differentiation and immune regulatory activity in amniotic-fluid–derived stem cells**

Rita Romani<sup>1</sup>, Chiara Donati<sup>2</sup>, Irene Pirisinu<sup>1</sup>, Caterina Bernacchioni<sup>2</sup>, Marco Gargaro<sup>1</sup>, Matteo Pirro<sup>3</sup>, Mario Calvitti<sup>1</sup>, Giorgia Manni<sup>1</sup>, Francesco Bagaglia<sup>3</sup>, Amirhossein Sahebkar<sup>4</sup>, Graziano Clerici<sup>5</sup>, Davide Martino<sup>1</sup>, Giovanni Pomili<sup>5</sup>, Gian Carlo Di Renzo<sup>5</sup>, Vincenzo Nicola Talesa<sup>1</sup>, Paolo Puccetti<sup>1</sup> and Francesca Fallarino<sup>1\*</sup>

Supplemental Figure 1

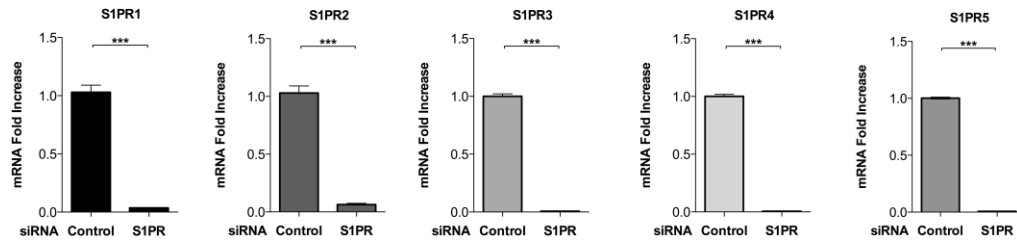

**Supplemental figure 1: Validation of S1PR<sub>1-5</sub> silencing by quantitative RT-PCR in fHASCs.** Real Time PCR was performed using 10<sup>6</sup> cells transfected with non-targeting siRNA (control ) or with siRNA specific for S1PR1, S1PR2, S1PR3, S1PR4 or S1PR5; the content of housekeeping gene 18S rRNA was analyzed in parallel. Data (means  $\pm$  S.D) are presented as normalized transcript expression in the samples relative to normalized transcript expression in cells cultured control medium. \*\*\*P < 0.001 by Student's t-test.

Supplemental Figure 2

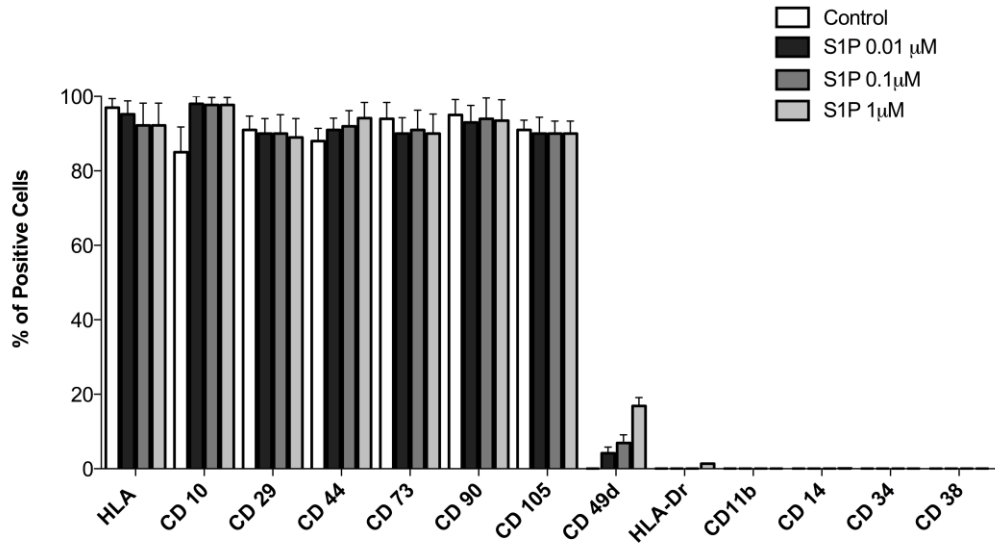

**Supplemental figure 2. Effects of S1P on expression of stromal markers in fHASCs.**

Analysis of stromal markers expression by FACS in fHASCs cultured for 24 h in media supplemented with delipidated serum with or without 1 or 0.1 μM S1P. Data are means ± S.D. of three independent experiments, each performed in triplicate.

Supplemental Figure 3

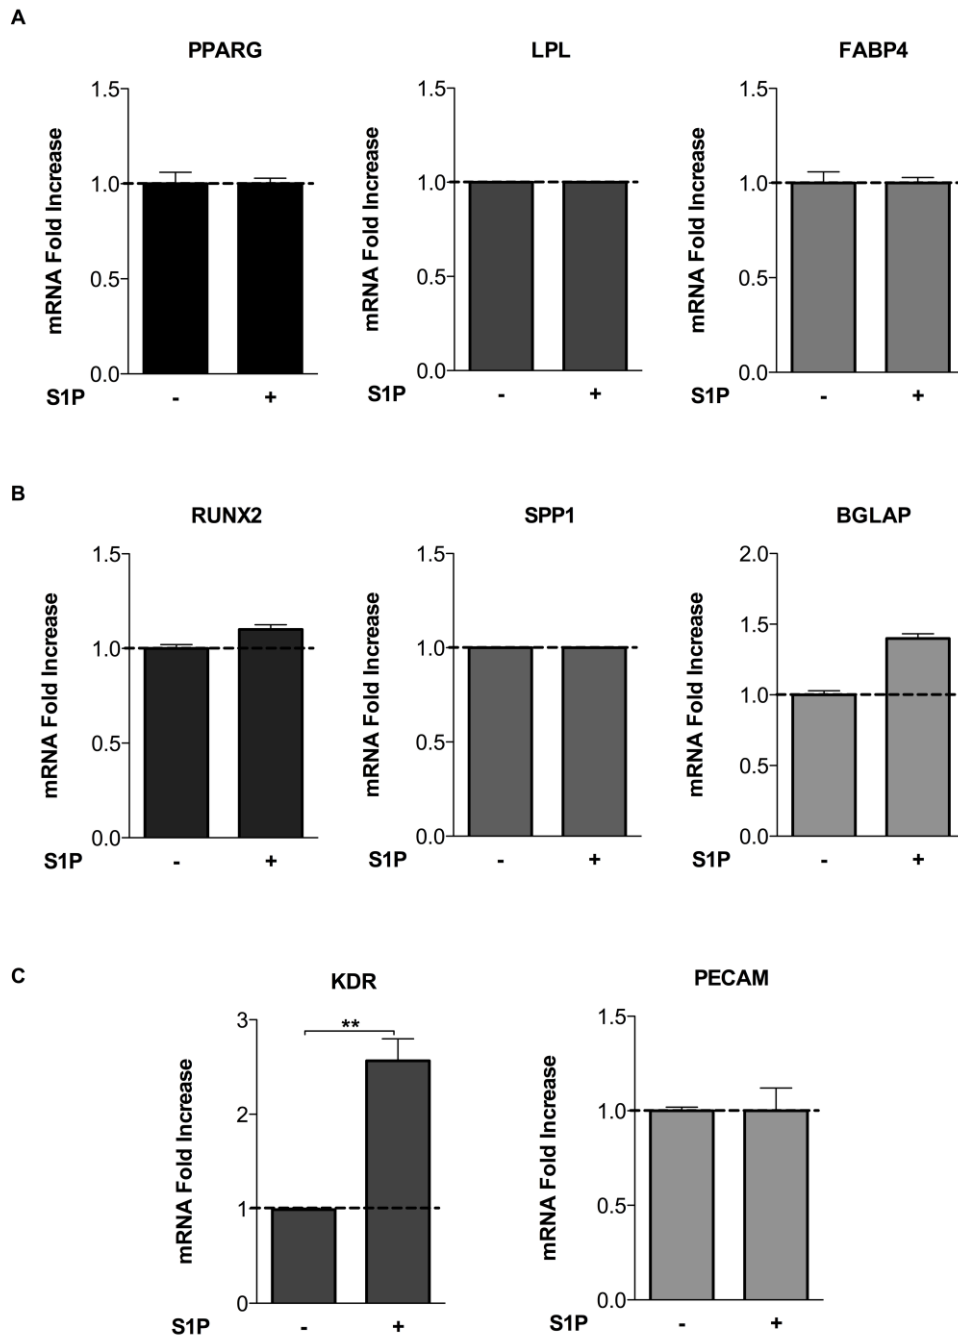

**Supplemental figure 3. S1P effects on fHASC differentiation potential towards specific cell lineages.** fHASCs were cultured in specific differentiation media for adipogenic, osteogenic or endothelial differentiation in combination with 1 $\mu$ M S1P.

A) mRNA levels of specific adipogenic markers. B) mRNA levels of specific osteogenic markers. C) mRNA levels of specific endothelial markers. Data (means  $\pm$  S.D) are presented as normalized transcript expressions in the samples relative to normalized transcript expression in control medium in one experiment representative of two.

### Supplemental Figure 4

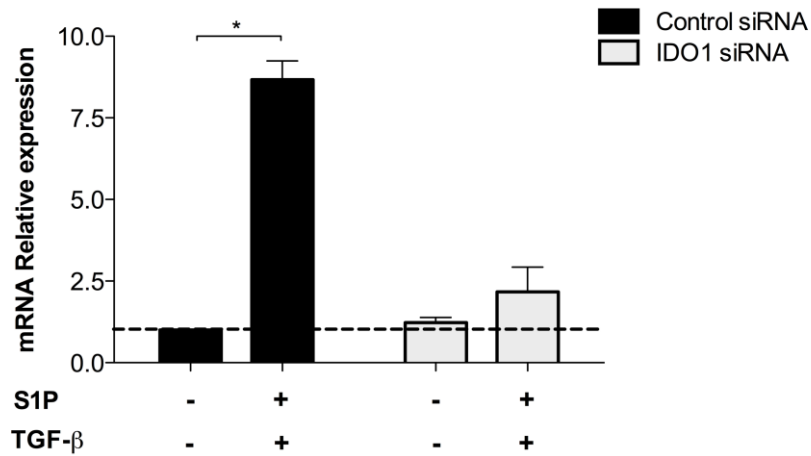

**Supplemental figure 4. Validation of IDO1 silencing by quantitative RT-PCR in fHASCs.** Real Time PCR was performed on  $10^6$  cells transfected with non-targeting siRNA (control) or with siRNA specific for IDO1. Data are means  $\pm$  S.D. of three independent experiments performed in triplicate. Data (means  $\pm$  S.D) are presented as normalized transcript expression in the samples relative to normalized transcript expression in cells cultured with control medium. \*\*P < 0.01 by ANOVA followed by Bonferroni multiple comparison test.

**Table 1. Real-time-q- PCR primer sequences**

| <i>Name</i>   | <i>Accession number</i> | <i>Forward sequences</i>       | <i>Reverse sequences</i>      |
|---------------|-------------------------|--------------------------------|-------------------------------|
| <i>OCT-4a</i> | NM_002701               | 5'GGGTTGAGTAGTCCCTTCGC3'       | 5'TAGCCAGGTCCGAGGATCAA3'      |
| <i>OCT-4b</i> | NM_001285987            | 5'ACGACCATCTGCCGCTTTG3'        | 5'GTTGCCTCTCACTCGGTTCTC3'     |
| <i>NANOG</i>  | NM_024865               | 5'CCACCAGTCCCAAAGGCAAAC3'      | 5'GAGGTTCAAGGATGTTGGAGAGTTC3' |
| <i>SOX2</i>   | NM_003106               | 5'AAGTAGTTTGCTGCCTCTTTAAG3'    | 5'GCTTCCCTCCTCCTCTGG3'        |
| <i>KLF4</i>   | NM_004235               | 5'ACGGCTGTGGATGGAAATTC3'       | 5'ATGTGTAAGGCGAGGTGGTC3'      |
| <i>SPP1</i>   | NM_001251830            | 5'GCAGGAGGAGGCAGAGCACAG3'      | 5'GGTCGGCGTTTGGCTGAGAAGG3'    |
| <i>BGLAP</i>  | NM_199173               | 5'CCTCACACTCCTCGCCCTATTGG3'    | 5'TCGCTGCCCTCCTGCTTGG3'       |
| <i>RUNX2</i>  | NM_001024630            | 5'ACTGTCATGGCGGTAACGATG3'      | 5'GTGAAGACGGTTATGGTCAAGGTG3'  |
| <i>PPARG</i>  | NM_015869               | 5'GGTTGACACAGAGATGCCATTC3'     | 5'TGGAGTAGAAATGCTGGAGAAGTC3'  |
| <i>LPL</i>    | NM_000237               | 5'CCGTGTGGCTCCAGAGTC3'         | 5'GAATGAGGTGGCAAGTGTCC3'      |
| <i>FABP4</i>  | NM_001442               | 5'AGAAGTAGGAGTGGGCTTTGC3'      | 5'ATCTAAGGTTATGGTGCTCTTGAC3'  |
| <i>PECAMI</i> | NM_000442               | 5'TGACGGAATCCTTCTCTACACC3'     | 5'TCGCCTTGCTCTCTGAATTATG3'    |
| <i>KDR</i>    | NM_002253               | 5' TTGGATGAACATTGTGAACGACTG 3' | 5' AGGCATCTGCTCAATCACTTGG 3'  |
| <i>ACTB</i>   | NM_001101               | 5'CTCTTCCAGCCTTCCTTCT3'        | 5'AGCACTGTGTTGGCGTACAG3'      |
